# Supplementary material for: Excellent energy storage density and efficiency in lead-free Sm-doped BaTiO3–Bi(Mg0.5Ti0.5)O3 ceramics
Source: Royal Society of Chemistry journal article supplement (doi:10.1039/d0tc03035j), 2020-01-01
Supplement: d0tc03035j1.pdf [file d0tc03035j1.pdf]

# Excellent energy storage density and efficiency in lead-free Sm-doped BaTiO<sub>3</sub>-Bi(Mg<sub>0.5</sub>Ti<sub>0.5</sub>)O<sub>3</sub> ceramics

Zhi-Gang Liu<sup>a,b,†</sup>, Zhen-Hua Tang<sup>a,†</sup>, Song-Cheng Hu<sup>a</sup>, Di-Jie Yao<sup>a</sup>, Fei Sun<sup>c</sup>, De-  
Yang Chen<sup>c</sup>, Xiao-Bin Guo<sup>a</sup>, Qiu-Xiang Liu<sup>a</sup>, Yan-Ping Jiang<sup>a</sup>, and Xin-Gui  
Tang<sup>a,\*</sup>

<sup>a</sup>*School of Physics and Optoelectric Engineering, Guangdong University of Technology,  
Guangzhou Higher Education Mega Centre, Guangzhou, 510006, China*

<sup>b</sup>*School of light industry and chemical engineering, Guangdong University of Technology,  
Guangzhou Higher Education Mega Centre, Guangzhou 510006, China*

<sup>c</sup>*Institute for Advanced Materials and Guangdong Provincial Key Laboratory of Optical  
Information Materials and Technology, South China Academy of Advanced Optoelectronics,  
South China Normal University, Guangzhou 510006, China*

*Zhi-Gang Liu<sup>†</sup> and Zhen-Hua Tang<sup>†</sup> contribute equally to this work.*

**\*Corresponding author: Dr Xin-Gui Tang ([xgtang@gdut.edu.cn](mailto:xgtang@gdut.edu.cn))**

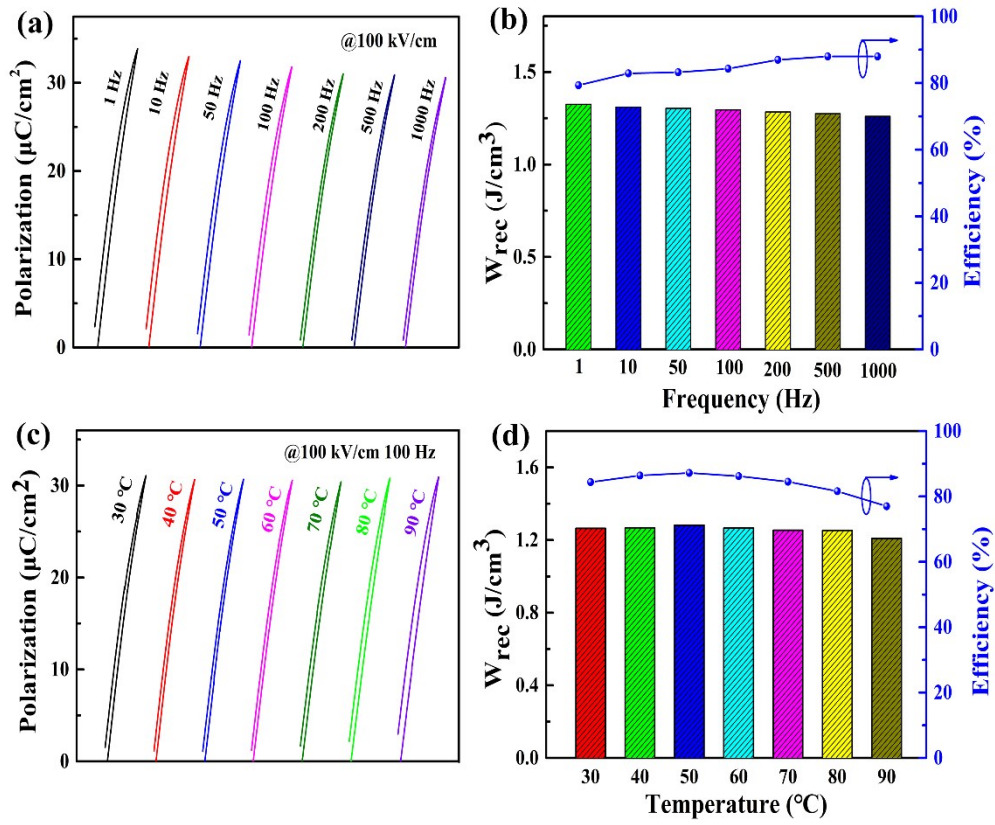

**Figure S1:** (a) The P-E loops (1 to 1000 Hz at RT with 100 kV cm<sup>-1</sup>), (b)  $W_{\text{rec}}$  and efficiency as function of frequency of BT-BMT-0.03Sm ceramics; (c) P-E loops (30 to 90 °C at 100Hz and 100 kV cm<sup>-1</sup>), (d)  $W_{\text{rec}}$  and efficiency as functions of temperature of the BT-BMT-0.03Sm ceramics.

The stability of frequency and temperature is a crucial factor to assess the application of energy storage ceramic in complex environments. **Fig. S1(a)** shows the unipolar P-E loops of BT-BMT-0.03Sm ceramics at RT and different frequencies. It can be found that the P-E curves are slim at high frequencies and the  $W_{\text{rec}}$  and efficiency are calculated and presented in **Fig.S1(b)**. As the increase of frequency, the values of  $W_{\text{rec}}$  decrease gradually ( $1.31 \text{ J cm}^{-3}$  to  $1.26 \text{ J cm}^{-3}$ ) and the efficiencies keep going up (79.3% to 87.9%). These fluctuations of  $W_{\text{rec}}$  and efficiency indicate a characteristic of frequency dependence. **Fig. S1(c)** illustrates unipolar P-E loops for BT-BMT-0.03Sm ceramics at 100 Hz and different temperatures and the calculated results are shown in **Fig. S1(d)**. Between the temperature ranges of  $30 \text{ }^{\circ}\text{C}$  to  $80 \text{ }^{\circ}\text{C}$ , the values of  $W_{\text{rec}}$  fluctuate  $1.26 \text{ J cm}^{-3}$  and the maximum fluctuation value doesn't exceed  $0.03 \text{ J cm}^{-3}$ . When the tested temperature reaches  $90 \text{ }^{\circ}\text{C}$ , the P-E loops exhibits a little fat and the energy storage efficiency is below 80%. These results indicate BT-BMT-0.03Sm ceramics present excellent temperature stability at temperature range of  $30 \text{ }^{\circ}\text{C}$  to  $80 \text{ }^{\circ}\text{C}$ .

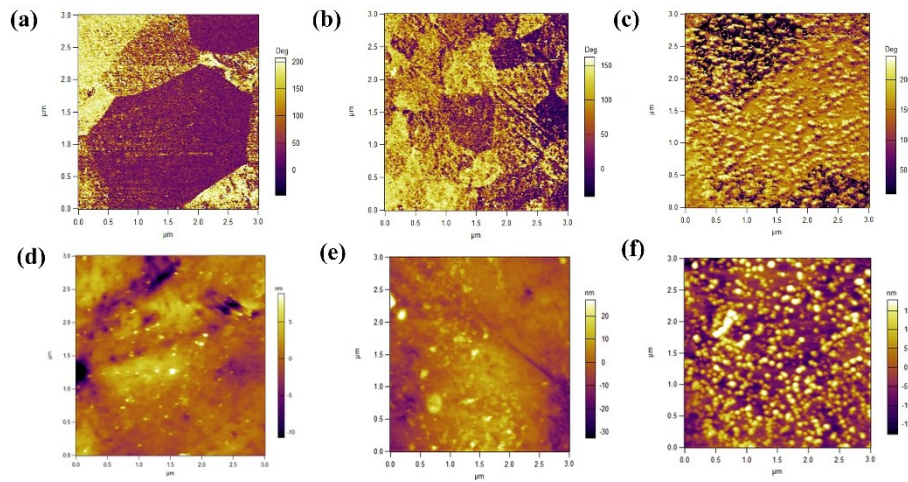

**Figure S2:** PFM in-plane and topography images of polished surface of BT-BMT- $x$ Sm ceramics. (a) and (d)  $x=0.005$ , (b) and (e)  $x=0.01$ , (c) and (f)  $x=0.04$ .

PFM is an effective method to investigate the domain structure. **Fig. S2(a-c)** show the PFM in-plane images of polished surface of BT-BMT- $x$ Sm ceramics and PFM topography images are displayed in **Fig. S2(d-f)**. There are no obvious changes in topography images. However, for domain structure, the domain size decreased first and then increased on the whole. The increasing doping contents may induce local microdomains size decrease and many small and irregular microdomains maybe lead to the enhancement of relaxation behaviours.
